# Supplementary material for: Benthic cover and community structure on shallow marine habitats in a transitional ecotone in Brazilian coast
Source: Research Square preprint supplement (doi:10.21203/rs.3.rs-6504113/v1), 2025-07-07

**Benthic cover and community structure on shallow marine habitats in a transitional ecotone in Brazilian coast**

Herick S. dos Santosa *, Luca Warwar Bretasa,b, Adriano Carvalho Vasconcelosa,c, Rodrigo Leão de Mourad, Fabiana C. Felix-Hackradta; Carlos W. Hackradta

a Marine Ecology and Conservation Lab. Centre for Environmental Science. Universidade Federal do Sul da Bahia. Rodovia Joel Maers s/n, Porto Seguro, Bahia, Brazil.

b Postgraduate Program in Tropical Aquatic Systems. Centre for Environmental Science. Universidade Federal do Sul da Bahia. Rodovia Joel Maers s/n, Porto Seguro, Bahia, Brazil.

c Postgraduate Program in Ecology and Biodiversity Conservation. Universidade Estadual de Santa Crus. Rodovia Jorge Amado, km 16. Ilhéus, Bahia, Brasil.

d Biology Institute and SAGE/COPPE. Universidade Federal do Rio de Janeiro. Av. Horacio Macedo, 2030. Ilha do Fundão, Cidade Universitária. Rio de Janeiro, Brazil.

*Corresponding author: hericksimas@yahoo.com.br

**Supplementary Material**

Supplementary material_Table 1: Cover percent (Mean and standard deviation) of benthic groups.

|  | **Guarapari** | | **Vitória** | | **APA** | | **Esquecidos** | | **Cassurubá** | | **Paredes** | | **Abrolhos** | |
| --- | --- | --- | --- | --- | --- | --- | --- | --- | --- | --- | --- | --- | --- | --- |
| **Benthic Groups** | Mean | SD | Mean | SD | Mean | SD | Mean | SD | Mean | SD | Mean | SD | Mean | SD |
| Chlorophyta | 0,61 | 0,419 | 0,09 | 0,103 | 1,1 | 1,408 | 2,27 | 2,303 | 2,15 | 2,943 | 1,24 | 1,531 | 4,75 | 4,173 |
| Ochrophyta | 8,48 | 10,283 | 5,48 | 1,576 | 3,8 | 3,950 | 0,91 | 0,984 | 10,74 | 12,835 | 1,98 | 1,920 | 13,87 | 13,439 |
| Rhodophyta | 1,02 | 1,390 | 0,18 | 0,250 | 5,4 | 8,569 | 0,25 | 0,335 | 0,23 | 0,494 | 0,41 | 0,521 | 0,41 | 0,304 |
| Coralline algae | 11,31 | 5,949 | 2,54 | 1,309 | 7,4 | 10,301 | 11,97 | 2,133 | 5,93 | 2,894 | 8,74 | 3,745 | 12,55 | 2,706 |
| Epilithic Algal Matrix | 46,30 | 16,435 | 58,92 | 15,388 | 38,0 | 21,799 | 23,39 | 7,714 | 29,82 | 11,436 | 39,55 | 14,261 | 37,65 | 10,599 |
| Cyanobacteria | 0,67 | 0,265 | 0,32 | 0,472 | 1,5 | 1,778 | 1,77 | 3,532 | 0,22 | 0,181 | 1,33 | 0,551 | 1,37 | 0,289 |
| Echinodermata | 2,34 | 1,976 | 6,93 | 4,754 | 5,87 | 5,299 | 0,05 | 0,027 | 0,09 | 0,096 | 0,03 | 0,020 | 0,11 | 0,083 |
| Porifera | 1,94 | 1,156 | 2,43 | 1,922 | 3,7 | 3,409 | 14,58 | 3,493 | 0,95 | 0,427 | 3,79 | 2,189 | 1,29 | 1,399 |
| Bryozoa | 9,18 | 16,101 | 1,39 | 0,863 | 6,3 | 8,108 | 0,27 | 0,120 | 0,05 | 0,056 | 0,04 | 0,036 | 0,17 | 0,169 |
| Antipatharia | 0,00 | 0,002 | 0,00 | 0,000 | 0,0 | 0,000 | 0,00 | 0,000 | 0,02 | 0,042 | 0,01 | 0,014 | 0,00 | 0,005 |
| Octocoralia | 2,89 | 2,115 | 1,30 | 1,256 | 0,6 | 0,689 | 0,27 | 0,162 | 2,77 | 2,903 | 7,95 | 4,951 | 0,10 | 0,118 |
| Scleractinia | 0,23 | 0,161 | 0,18 | 0,185 | 0,3 | 0,432 | 13,84 | 6,680 | 8,37 | 5,763 | 12,04 | 6,110 | 10,96 | 4,095 |
| Zoantharian | 3,57 | 4,137 | 9,14 | 8,139 | 0,5 | 0,799 | 27,03 | 15,549 | 27,27 | 10,040 | 8,03 | 12,006 | 5,80 | 5,137 |
| Actiniaria | 0,00 | 0,002 | 0,00 | 0,000 | 0,0 | 0,015 | 0,01 | 0,008 | 0,04 | 0,066 | 0,02 | 0,015 | 0,02 | 0,017 |
| Hydrozoa | 1,28 | 0,897 | 1,21 | 2,052 | 5,4 | 5,064 | 0,22 | 0,267 | 1,16 | 0,700 | 1,03 | 0,468 | 1,59 | 1,985 |
| Other Taxa | 3,72 | 6,319 | 3,42 | 5,685 | 2,4 | 2,370 | 0,29 | 0,083 | 0,17 | 0,214 | 0,47 | 0,609 | 0,19 | 0,334 |
| Empty Substrate | 6,44 | 3,504 | 6,45 | 4,199 | 17,8 | 19,426 | 2,89 | 3,191 | 10,01 | 7,304 | 13,34 | 6,060 | 9,16 | 4,874 |

Supplementary material_Table 2: Cnidarian species

|  | **Guarapari** | | **Vitoria** | | **APA** | | **Esquecidos** | | **Cassurubá** | | **Paredes** | | **Abrolhos** | |
| --- | --- | --- | --- | --- | --- | --- | --- | --- | --- | --- | --- | --- | --- | --- |
| ANTHOZOA | Mean | SD | Mean | SD | Mean | SD | Mean | SD | Mean | SD | Mean | SD | Mean | SD |
| Class: Hexacoralia |  |  |  |  |  |  |  |  |  |  |  |  |  |  |
| Order: Scleractinia |  |  |  |  |  |  |  |  |  |  |  |  |  |  |
| *Agaricia agaricites* (Linnaeus, 1758) | 0,00 | 0,000 | 0,01 | 0,018 | 0,00 | 0,000 | 0,17 | 0,158 | 0,20 | 0,121 | 0,27 | 0,126 | 0,39 | 0,462 |
| *Agaricia humilis* Verrill, 1901 | 0,00 | 0,000 | 0,01 | 0,017 | 0,00 | 0,000 | 0,13 | 0,106 | 0,13 | 0,176 | 0,03 | 0,041 | 0,54 | 0,651 |
| *Agaricia fragili*s Dana, 1846 | 0,00 | 0,000 | 0,01 | 0,018 | 0,00 | 0,000 | 0,15 | 0,103 | 0,01 | 0,024 | 0,03 | 0,021 | 0,17 | 0,116 |
| *Astrangia solitaria* (Le Sueur, 1817) | 0,00 | 0,004 | 0,01 | 0,018 | 0,00 | 0,000 | 0,00 | 0,000 | 0,00 | 0,000 | 0,01 | 0,018 | 0,00 | 0,000 |
| *Favia gravida* Verrill,1868 | 0,00 | 0,006 | 0,01 | 0,018 | 0,00 | 0,006 | 0,01 | 0,009 | 0,06 | 0,035 | 0,41 | 0,290 | 0,08 | 0,042 |
| *Madracis decactis* (Lyman,1859) | 0,01 | 0,010 | 0,03 | 0,020 | 0,00 | 0,003 | 1,64 | 0,830 | 0,12 | 0,203 | 0,05 | 0,051 | 0,08 | 0,051 |
| *Meandrina braziliensis* (Milne Edwards & Haime,1848) | 0,00 | 0,000 | 0,01 | 0,017 | 0,00 | 0,000 | 0,00 | 0,000 | 0,12 | 0,287 | 0,03 | 0,031 | 0,02 | 0,043 |
| *Monstastraea cavernosa* (Linnaeus, 1767) | 0,00 | 0,000 | 0,01 | 0,017 | 0,00 | 0,000 | 4,78 | 2,976 | 3,98 | 4,223 | 7,20 | 5,701 | 1,47 | 1,110 |
| *Mussismilia braziliensis* (Verrill, 1868) | 0,00 | 0,000 | 0,01 | 0,017 | 0,00 | 0,000 | 0,00 | 0,003 | 0,27 | 0,246 | 0,29 | 0,224 | 3,52 | 3,142 |
| *Mussismilia hartii* (Verrill, 1868) | 0,00 | 0,000 | 0,01 | 0,017 | 0,00 | 0,003 | 3,41 | 2,781 | 2,54 | 2,533 | 1,76 | 1,441 | 0,63 | 0,543 |
| *Mussismilia hispida* (Verrill, 1901) | 0,05 | 0,073 | 0,12 | 0,209 | 0,14 | 0,340 | 2,66 | 1,532 | 0,47 | 0,293 | 0,45 | 0,247 | 0,50 | 0,285 |
| *Mussismilia leptophylla* (Verril, 1868) | 0,00 | 0,000 | 0,01 | 0,017 | 0,00 | 0,000 | 0,00 | 0,002 | 0,01 | 0,026 | 0,02 | 0,028 | 0,00 | 0,004 |
| *Porites astreoides* Lamarck, 1816 | 0,01 | 0,011 | 0,03 | 0,018 | 0,00 | 0,000 | 0,09 | 0,179 | 0,02 | 0,024 | 0,24 | 0,285 | 0,01 | 0,013 |
| *Porites branneri* Rathbun,1888 | 0,08 | 0,105 | 0,01 | 0,017 | 0,00 | 0,000 | 0,01 | 0,009 | 0,03 | 0,022 | 0,16 | 0,122 | 0,03 | 0,028 |
| *Scolymia cubensis* (Milne Edwards & Haime,1848) | 0,00 | 0,000 | 0,01 | 0,017 | 0,00 | 0,003 | 0,00 | 0,000 | 0,01 | 0,011 | 0,01 | 0,006 | 0,02 | 0,022 |
| *Scolymia welsii* Laborel, 1967 | 0,00 | 0,004 | 0,01 | 0,017 | 0,00 | 0,000 | 0,01 | 0,006 | 0,03 | 0,035 | 0,03 | 0,031 | 0,01 | 0,014 |
| *Siderastrea stellata* Verrill, 1868 | 0,08 | 0,066 | 0,03 | 0,024 | 0,14 | 0,337 | 0,77 | 0,585 | 0,44 | 0,414 | 1,04 | 0,837 | 3,48 | 3,588 |
| *Stephanocoenia intersepta* (Esper,1795) | 0,00 | 0,001 | 0,01 | 0,017 | 0,00 | 0,000 | 0,00 | 0,002 | 0,00 | 0,000 | 0,01 | 0,012 | 0,01 | 0,012 |
| Order: Antipatharia |  |  |  |  |  |  |  |  |  |  |  |  |  |  |
| *Antipathes* sp. Pallas 1766 | 0,00 | 0,000 | 0,00 | 0,000 | 0,00 | 0,000 | 0,00 | 0,000 | 0,02 | 0,038 | 0,00 | 0,011 | 0,00 | 0,005 |
| *Cirripathes* sp. de Blainville, 1830 | 0,00 | 0,000 | 0,00 | 0,000 | 0,00 | 0,000 | 0,00 | 0,000 | 0,00 | 0,000 | 0,00 | 0,000 | 0,00 | 0,000 |
| Other Antipatharians | 0,00 | 0,002 | 0,00 | 0,000 | 0,00 | 0,000 | 0,00 | 0,000 | 0,00 | 0,006 | 0,00 | 0,004 | 0,00 | 0,000 |

|  | **Vitória** | | **Guarapari** | | **Abrolhos** | | **Paredes** | | **Cassurubá** | | **Esquecidos** | | **APA** | | |
| --- | --- | --- | --- | --- | --- | --- | --- | --- | --- | --- | --- | --- | --- | --- | --- |
| Order: Zoantharia | Mean | SD | Mean | SD | Mean | SD | Mean | SD | SD | Mean | SD | Mean | Mean | SD |
| *Palythoa caribeorum* Duchassaing & Michelotti,1860 | 9,125 | 8,130 | 3,501 | 4,118 | 5,715 | 5,11 | 7,754 | 13,182 | 26,776 | 9,749 | 26,928 | 15,520 | 0,210 | 0,337 |
| *Zoanthus sociatus* (Ellis,1768) | 0,008 | 0,016 | 0,033 | 0,063 | 0,086 | 0,06 | 0,219 | 0,198 | 0,365 | 0,358 | 0,058 | 0,043 | 0,107 | 0,202 |
| Other Zoantharians | 0,029 | 0,022 | 0,034 | 0,063 | 0,004 | 0,00 | 0,053 | 0,053 | 0,042 | 0,050 | 0,040 | 0,023 | 0,261 | 0,393 |
| Order: Actiniaria |  |  |  |  |  |  |  |  |  |  |  |  |  |  |
| *Alicia mirabilis* Johnson, 1861 | 0,007 | 0,016 | 0,000 | 0,000 | 0,000 | 0,00 | 0,000 | 0,000 | 0,000 | 0,000 | 0,000 | 0,000 | 0,000 | 0,000 |
| *Condylactis gigantea* (Weinland, 1860) | 0,007 | 0,016 | 0,000 | 0,000 | 0,000 | 0,00 | 0,010 | 0,016 | 0,001 | 0,002 | 0,002 | 0,003 | 0,000 | 0,000 |
| *Bellactis ilkalyseae* Dube, 1983 | 0,007 | 0,016 | 0,000 | 0,000 | 0,000 | 0,00 | 0,001 | 0,002 | 0,000 | 0,000 | 0,000 | 0,000 | 0,000 | 0,000 |
| *Lebrunia* sp. Duchassaing & Michelotti, 1860 | 0,007 | 0,016 | 0,000 | 0,000 | 0,019 | 0,01 | 0,003 | 0,006 | 0,040 | 0,069 | 0,001 | 0,002 | 0,000 | 0,000 |
| Other Actiniarians | 0,007 | 0,016 | 0,001 | 0,002 | 0,002 | 0,00 | 0,003 | 0,004 | 0,001 | 0,002 | 0,004 | 0,007 | 0,006 | 0,015 |
| Order: Scleralcyonacea |  |  |  |  |  |  |  |  |  |  |  |  |  |  |
| *Elisella elongata* (Pallas, 1766) | 0,000 | 0,000 | 0,000 | 0,000 | 0,000 | 0,00 | 0,002 | 0,004 | 0,003 | 0,007 | 0,000 | 0,000 | 0,000 | 0,000 |
| Class: Octocoralia |  |  |  |  |  |  |  |  |  |  |  |  |  |  |
| Order: Malacalcyonacea |  |  |  |  |  |  |  |  |  |  |  |  |  |  |
| *Carijoa riisei* (Duchassaing & Michelotti, 1860) | 0,027 | 0,051 | 0,015 | 0,036 | 0,000 | 0,00 | 0,330 | 0,334 | 0,032 | 0,072 | 0,110 | 0,082 | 0,364 | 0,645 |
| *Neospongodes atlantica* Kükenthal, 1903 | 0,00 | 0,00 | 0,00 | 0,01 | 0,06 | 0,15 | 0,00 | 0,00 | 1,77 | 2,89 | 5,66 | 7,61 | 0,05 | 0,11 |
| *Heterogorgia uatumani* Castro, 1990 | 0,003 | 0,005 | 0,000 | 0,000 | 0,000 | 0,00 | 0,000 | 0,000 | 0,000 | 0,000 | 0,001 | 0,002 | 0,000 | 0,000 |
| *Leptgorgia* sp. Milne Edwards, 1857 | 0,005 | 0,013 | 0,000 | 0,000 | 0,000 | 0,00 | 0,005 | 0,011 | 0,000 | 0,000 | 0,000 | 0,000 | 0,000 | 0,000 |
| *Leptogorgia punicea* (Milne Edwards & Haime, 1857) | 0,000 | 0,001 | 0,001 | 0,003 | 0,000 | 0,00 | 0,000 | 0,000 | 0,000 | 0,000 | 0,000 | 0,000 | 0,001 | 0,002 |
| *Muricea flamma* Marques & Castro, 1995 | 0,227 | 0,418 | 1,091 | 1,472 | 0,000 | 0,00 | 0,003 | 0,006 | 0,131 | 0,273 | 0,000 | 0,000 | 0,030 | 0,025 |
| *Muriceopsis sulphurea* (Donovan, 1825) | 0,239 | 0,245 | 1,090 | 1,296 | 0,024 | 0,06 | 0,058 | 0,072 | 0,217 | 0,285 | 0,013 | 0,021 | 0,008 | 0,013 |
| *Phyllogorgia dilatata (Esper, 1806)* | 0,308 | 0,400 | 0,284 | 0,320 | 0,002 | 0,01 | 0,279 | 0,403 | 0,507 | 0,616 | 0,000 | 0,000 | 0,000 | 0,000 |
| *Plexaurella* sp. Kölliker, 1865 | 0,398 | 0,263 | 0,333 | 0,450 | 0,018 | 0,04 | 0,078 | 0,089 | 0,110 | 0,181 | 0,011 | 0,018 | 0,007 | 0,018 |
| Other Octocorals | 0,109 | 0,206 | 0,077 | 0,080 | 0,004 | 0,01 | 0,003 | 0,006 | 0,003 | 0,006 | 0,134 | 0,109 | 0,122 | 0,177 |

|  | **Vitória** | | **Guarapari** | | **Abrolhos** | | **Paredes** | | **Cassurubá** | | **Esquecidos** | | **APA** | |
| --- | --- | --- | --- | --- | --- | --- | --- | --- | --- | --- | --- | --- | --- | --- |
| Class: Hydrozoa | Mean | SD | Mean | SD | Mean | SD | Mean | SD | Mean | SD | Mean | SD | Mean | SD |
| Order: Anthoathecata |  |  |  |  |  |  |  |  |  |  |  |  |  |  |
| *Millepora alcicornis* Linnaeus, 1758 | 0,006 | 0,016 | 0,297 | 0,505 | 1,240 | 1,778 | 0,934 | 0,567 | 1,062 | 0,785 | 0,185 | 0,277 | 0,000 | 0,000 |
| *Millepora braziliensis* Verrill, 1868 | 0,006 | 0,016 | 0,047 | 0,085 | 0,339 | 0,378 | 0,011 | 0,023 | 0,045 | 0,111 | 0,000 | 0,000 | 0,000 | 0,000 |
| *Millepora nitida* Verrill, 1868 | 0,006 | 0,016 | 0,000 | 0,000 | 0,000 | 0,000 | 0,013 | 0,015 | 0,056 | 0,072 | 0,000 | 0,000 | 0,000 | 0,000 |
| *Stylaster roseus* | 0,006 | 0,016 | 0,000 | 0,000 | 0,000 | 0,000 | 0,000 | 0,000 | 0,007 | 0,013 | 0,000 | 0,000 | 0,000 | 0,000 |
| Order: Leptothecata |  |  |  |  |  |  |  |  |  |  |  |  |  |  |
| *Gymnangium allmani* (Marktanner-Turneretscher, 1890) | 0,007 | 0,016 | 0,003 | 0,008 | 0,000 | 0,000 | 0,000 | 0,000 | 0,001 | 0,002 | 0,002 | 0,003 | 0,110 | 0,266 |
| *Macrorhynchia* sp Kirchenpauer, 1872 | 0,504 | 0,897 | 0,069 | 0,079 | 0,000 | 0,000 | 0,000 | 0,000 | 0,000 | 0,000 | 0,000 | 0,000 | 0,918 | 1,547 |
| Other Hydrozoans | 0,868 | 1,089 | 0,722 | 1,165 | 4,328 | 3,820 | 0,032 | 0,026 | 0,005 | 0,009 | 0,075 | 0,183 | 0,007 | 0,018 |

Supplementary material_Table 3: Contribution of Environmental variables to variance in species composition.

|  | DF | Variance | F | Pr (>F) |
| --- | --- | --- | --- | --- |
| Temperature (°c) | 1 | 0.065990 | 717.451 | 0.001 |
| Depth (m) | 1 | 0.019705 | 214.235 | 0.001 |
| Turbity (m) | 1 | 0.005589 | 60.761 | 0.001 |
| Rugosity | 1 | 0.004025 | 43.758 | 0.004 |
| Inclination (°) | 1 | 0.007224 | 78.537 | 0.001 |
| Sand | 1 | 0.004870 | 52.944 | 0.002 |
| Rubble (%) | 1 | 0.001518 | 16.499 | 0.119 |
| Residual | 244 | 0.224426 |  |  |

Supplementary material_Table 4: Summary of SAD models.

| Guarapari |  |  | |  |  |  |
| --- | --- | --- | --- | --- | --- | --- |
|  | par1 | par2 | par3 | Deviance | AIC | BIC |
| Null | 277.878 | 846.665 | 846.665 |  |  |  |
| Preemption | 0.21344 | 225.355 | 814.142 | 824.100 |  |  |
| Lognormal | 0.78821 | 13.322 | 90.511 | 699.298 | 719.212 |  |
| Zipf | 0.35764 | -12.213 | 49.457 | 658.244 | 678.159 |  |
| Mandelbrot | 0.35765 | -12.213 | 2,25E-02 | 49.457 | 678.244 | 708.116 |
|  |  |  |  |  |  |  |
| Vitória | par1 | par2 | par3 | Deviance | AIC | BIC |
| Null | 687.403 | 1.113.181 | 1.113.181 |  |  |  |
| Preemption | 0.35841 | 426.835 | 872.613 | 879.693 |  |  |
| Lognormal | 0.52377 | 1.817 | 167.195 | 632.973 | 647.134 |  |
| Zipf | 0.54423 | -17.065 | 61.086 | 526.864 | 541.025 |  |
| Mandelbrot | 0.54423 | -17.065 | 4,17E-03 | 61.086 | 546.864 | 568.105 |
|  |  |  |  |  |  |  |
| APA | par1 | par2 | par3 | Deviance | AIC | BIC |
| Null | 262.641 | 785.415 | 785.415 |  |  |  |
| Preemption | 0.23326 | 238.014 | 780.788 | 789.120 |  |  |
| Lognormal | 10.322 | 12.965 | 91.952 | 654.726 | 671.391 |  |
| Zipf | 0.37689 | -12.445 | 32.983 | 595.756 | 612.421 |  |
| Mandelbrot | 0.37689 | -12.445 | 2,25E-02 | 32.983 | 615.756 | 640.753 |
|  |  |  |  |  |  |  |
| Esquecidos | par1 | par2 | par3 | Deviance | AIC | BIC |
| Null | 101.455 | 533.030 | 533.030 |  |  |  |
| Preemption | 0.27655 | 41.744 | 493.320 | 498.969 |  |  |
| Lognormal | 14.512 | 11.435 | 68.092 | 539.667 | 550.966 |  |
| Zipf | 0.36123 | -11.402 | 104.031 | 575.606 | 586.905 |  |
| Mandelbrot | 22144 | -47.141 | 97.322 | 30.129 | 521.704 | 538.653 |
|  |  |  |  |  |  |  |
| Cassurubá | par1 | par2 | par3 | Deviance | AIC | BIC |
| Null | 221.049 | 677.978 | 677.978 |  |  |  |
| Preemption | 0.28687 | 88.984 | 565.914 | 572.995 |  |  |
| Lognormal | 11.065 | 13.352 | 91.426 | 588.355 | 602.516 |  |
| Zipf | 0.39633 | -12.745 | 102.287 | 599.217 | 613.378 |  |
| Mandelbrot | 46.284 | -3.017 | 40.724 | 44.783 | 561.713 | 582.954 |
|  |  |  |  |  |  |  |
| Paredes | par1 | par2 | par3 | Deviance | AIC | BIC |
| Null | 250.519 | 724.544 | 724.544 |  |  |  |
| Preemption | 0.27357 | 155.584 | 649.609 | 657.335 |  |  |
| Lognormal | 0.91645 | 14.064 | 52.534 | 566.559 | 582.011 |  |
| Zipf | 0.41203 | -13.312 | 25.892 | 539.917 | 555.369 |  |
| Mandelbrot | 0.43344 | -13.533 | 0.041165 | 25.865 | 559.889 | 583.067 |
|  |  |  |  |  |  |  |
| Abrolhos | par1 | par2 | par3 | Deviance | AIC | BIC |
| Null | 264.796 | 840.308 | 840.308 |  |  |  |
| Preemption | 0.21433 | 206.948 | 802.460 | 812.417 |  |  |
| Lognormal | 0.81758 | 13.335 | 73.295 | 688.807 | 708.722 |  |
| Zipf | 0.35794 | -12.221 | 31.233 | 646.745 | 666.660 |  |
| Mandelbrot | 0.35795 | -12.221 | 1,16E-01 | 31.233 | 666.745 | 696.617 |

Supplementary material_Figure 1: Mean of cnidarians cover in GU (Guarapari), VI (Vitória), AP (APA Costa da Algas), ES (Esquecidos Reef), CA (Cassurubá), PA (Paredes Parcel) and AB (Abrolhos). Color bands indicate Southern (light green) and Northern (light blue) sites. Boxes hinges represent the upper and lower quartiles. Inner line present median. Two whiskers represent Standard Error. Black dots represent outliers.


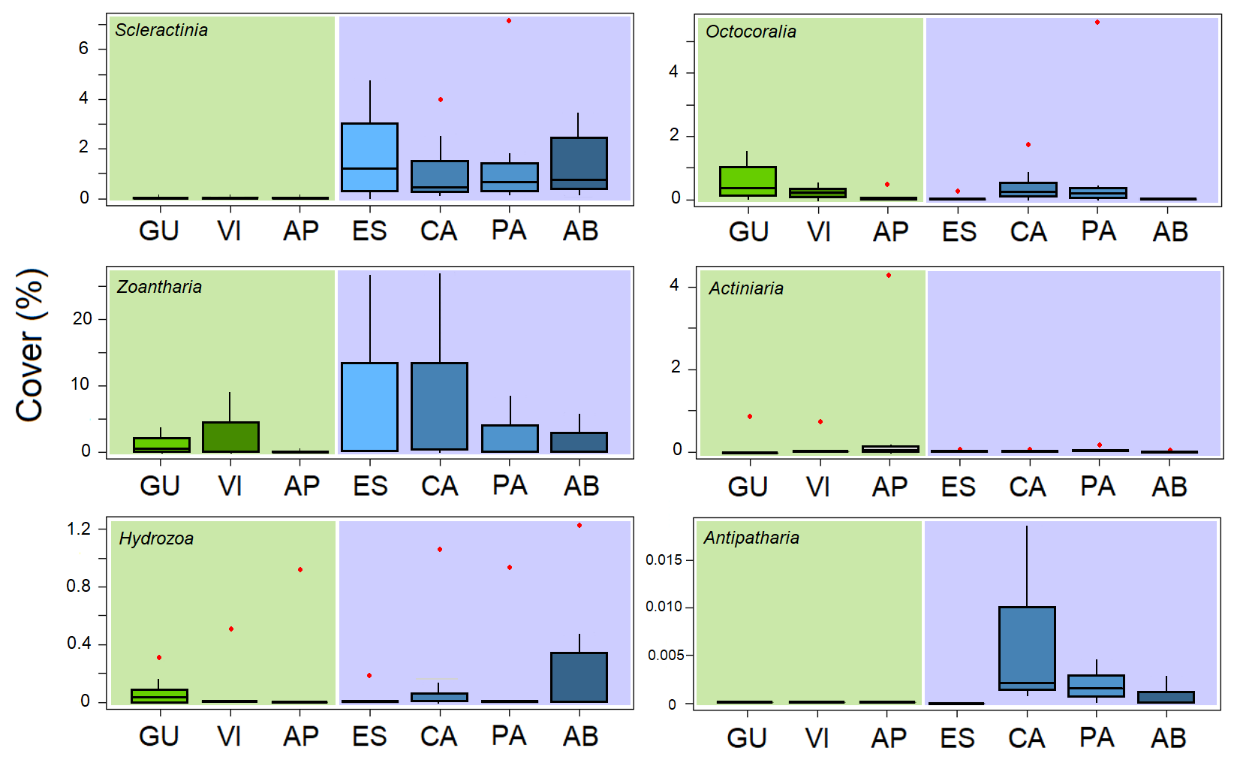


Supplementary material_Figure 2: Non-hierarchical clustering (kmeans method) based on Bray-Curtis distance of benthic cover in 42 subareas into 7 sites


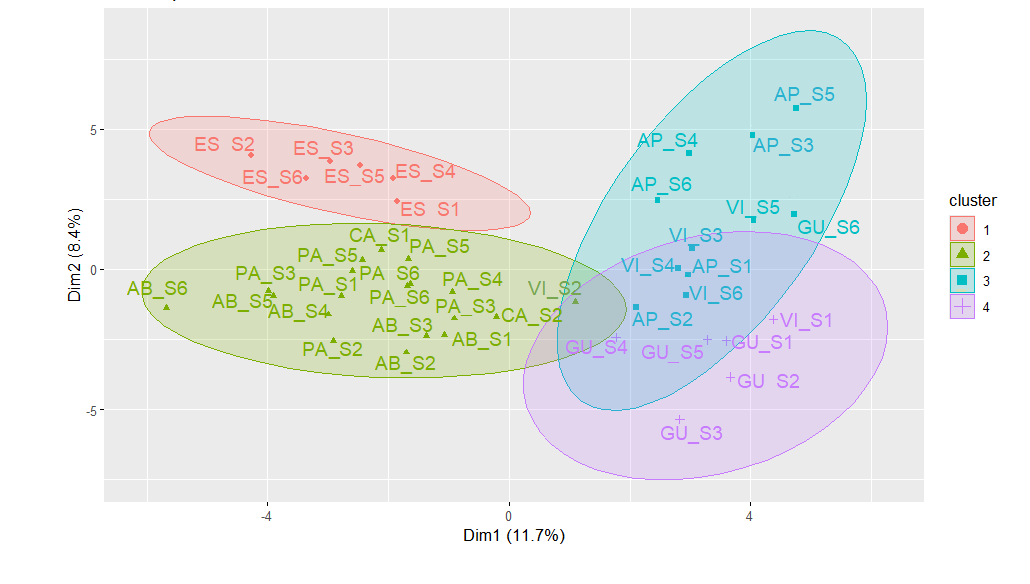


Supplementary material_Figure 3_Figure 10: Total Beta Diversity contribution of main taxonomic groups


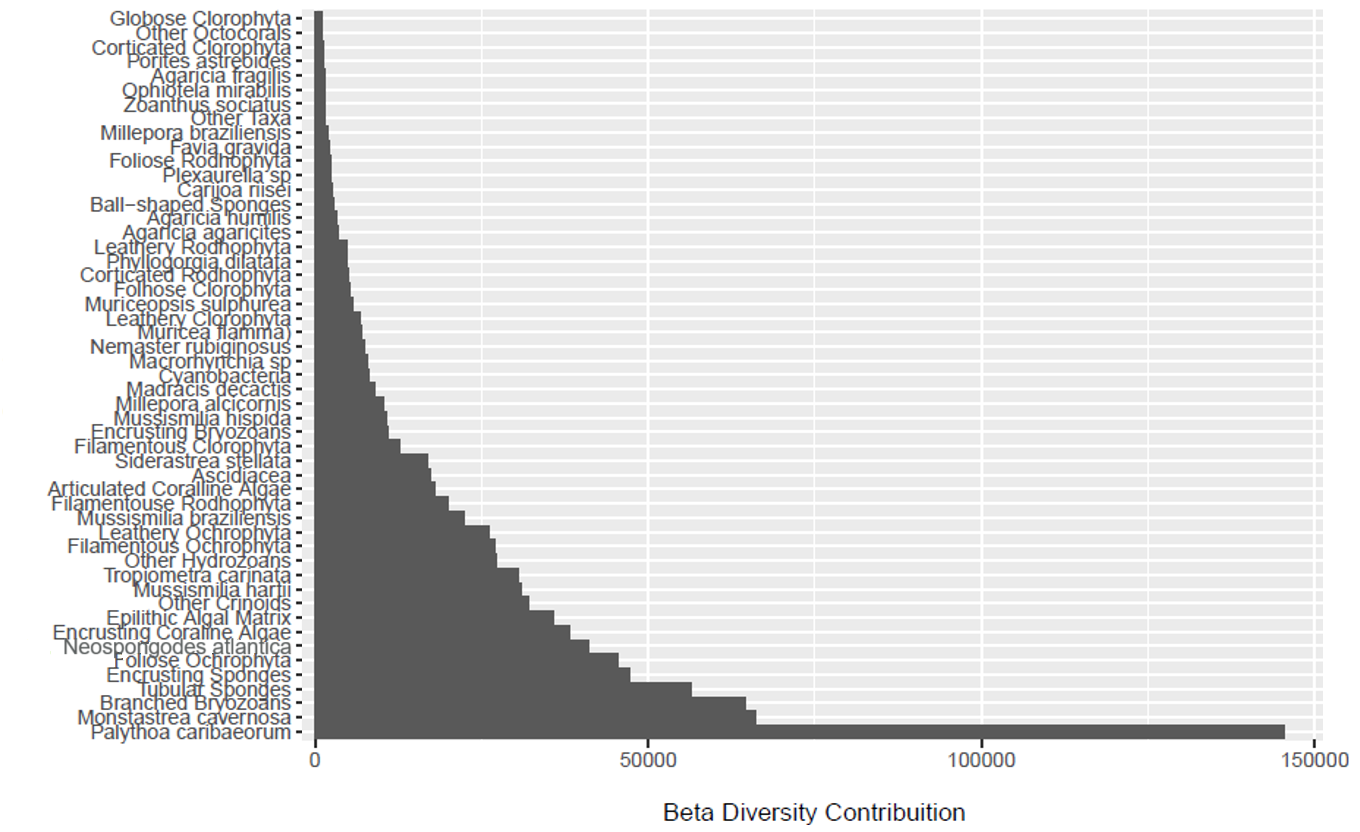


Supplementary material_Figure 4: Species abundance distribution (SAD) of benthic species in seven sites. Dots represent the species ranked according to abundance and the lines represent the predictions of mathematical models.


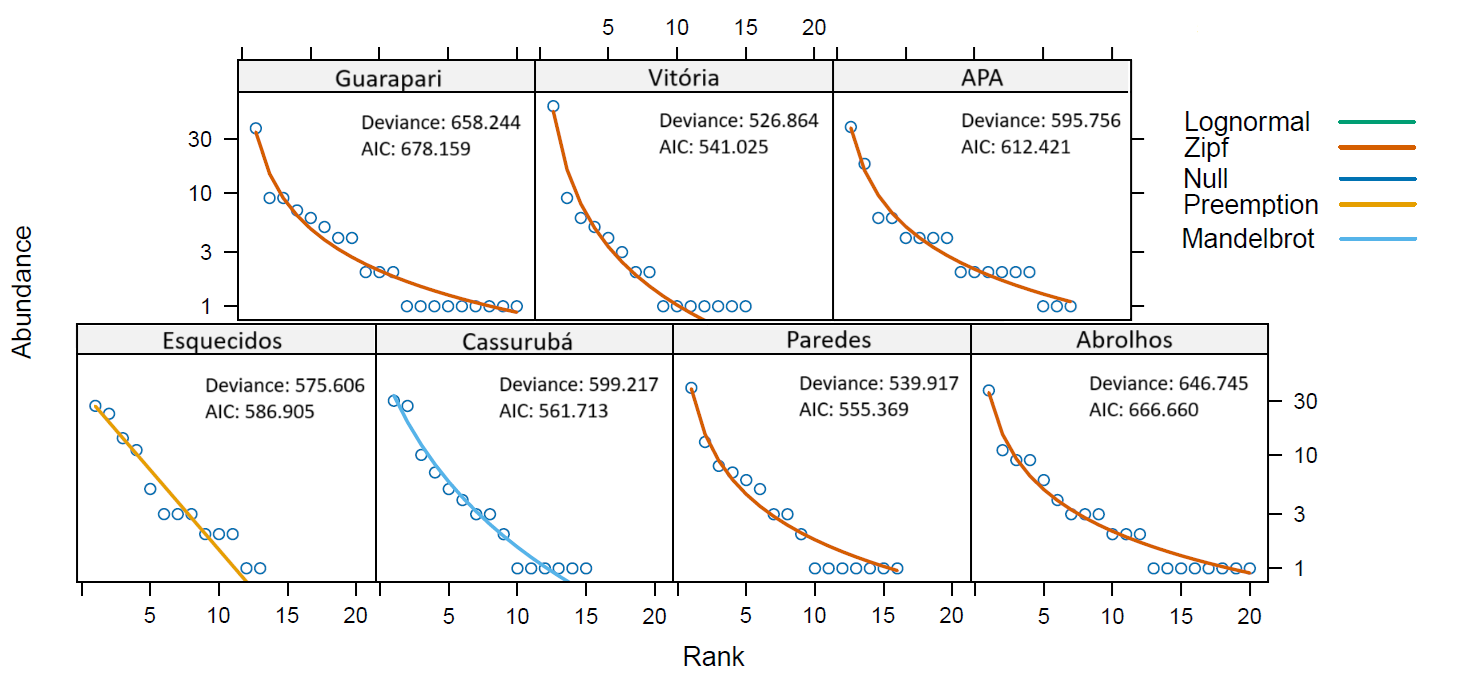

Supplement: Supplementary file 1 [file 0243c78fc6c5a797ca2e4eab.docx]
